# Supplementary material for: Role of the Fe–FeCl2 contact interface in promoting redox reversibility and electrochemical kinetics in Fe/FeCl2–graphite molten salt batteries
Source: Royal Society of Chemistry journal article supplement (doi:10.1039/d6sc03818b), 2026-06-05
Supplement: d6sc03818b1.pdf [file d6sc03818b1.pdf]

## Supplementary Information

### **Role of the Fe-FeCl<sub>2</sub> Contact Interface in Promoting Redox Reversibility and Electrochemical Kinetics in Fe/FeCl<sub>2</sub>-Graphite Molten Salt Battery**

*Wenlong Zhang, Xiaohui Ning\**

#### **Author Address**

*Wenlong Zhang*-Center for Alloy Innovation and Design (CAID), State Key Laboratory for Mechanical Behavior of Materials, Xi'an Jiaotong University, Xi'an, Shaanxi 710049, P. R. China.

*Xiaohui Ning*-Center for Alloy Innovation and Design (CAID), State Key Laboratory for Mechanical Behavior of Materials, Xi'an Jiaotong University, Xi'an, Shaanxi 710049, P. R. China. Email: xiaohuining@mail.xjtu.edu.cn

Number of pages: 10

Number of figures: 18

## Table of Contents

|                                                                                                                                            |    |
|--------------------------------------------------------------------------------------------------------------------------------------------|----|
| Figure S1. Schematic diagram of three-electrode testing device.....                                                                        | S3 |
| Figure S2. CV Curves of the Au electrode in three-electrode system.....                                                                    | S3 |
| Figure S3. CV Curves of the Fe-FeCl <sub>2</sub> -CR-60 electrode in three-electrode system ...                                            | S3 |
| Figure S4. Cycling performance of the FeCl <sub>2</sub> -CR electrode in Fe/FeCl <sub>2</sub> -Graphite<br>molten salt battery.....        | S4 |
| Figure S5. Cycling performance of the Fe-FeCl <sub>2</sub> -CR-60 electrode in Fe/FeCl <sub>2</sub> -<br>Graphite molten salt battery..... | S4 |
| Figure S6. Cycling performance of the Fe-FeCl <sub>2</sub> -CR-60 electrode.....                                                           | S5 |
| Figure S7. Cycling performance of the Fe-FeCl <sub>2</sub> -CR-20 electrode.....                                                           | S5 |
| Figure S8. Cycling performance of the Fe-FeCl <sub>2</sub> -CR-40 electrode.....                                                           | S5 |
| Figure S9. Cycling performance of the Fe-FeCl <sub>2</sub> -CR-80 electrode.....                                                           | S6 |
| Figure S10. Cycling performance of the Fe-CR electrode.....                                                                                | S6 |
| Figure S11. The electrochemical characteristics of Fe-FeCl <sub>2</sub> -CR electrodes.....                                                | S7 |
| Figure S12. Galvanostatic chlorination curves of Fe-CR electrode.....                                                                      | S7 |
| Figure S13. XRD pattern of FeCl <sub>2</sub> material.....                                                                                 | S8 |
| Figure S14. XRD pattern of nano-Fe powder material.....                                                                                    | S8 |
| Figure S15. The original chart of the adsorbed energy calculation (-3.67eV) of Fe <sup>0</sup><br>cluster at FeCl <sub>2</sub> (003).....  | S8 |
| Figure S16. The original chart of the adsorbed energy calculation (-55.937eV) of Fe <sup>0</sup><br>cluster at Fe (110).....               | S9 |
| Figure S17. The original chart of the adsorbed energy calculation (-47.782eV) of Fe <sup>0</sup>                                           |    |

cluster at Fe (200).....S9

Figure **S18**. The original chart of the adsorbed energy calculation (-38.934eV) of Fe<sup>0</sup>

cluster at Fe (211).....S10

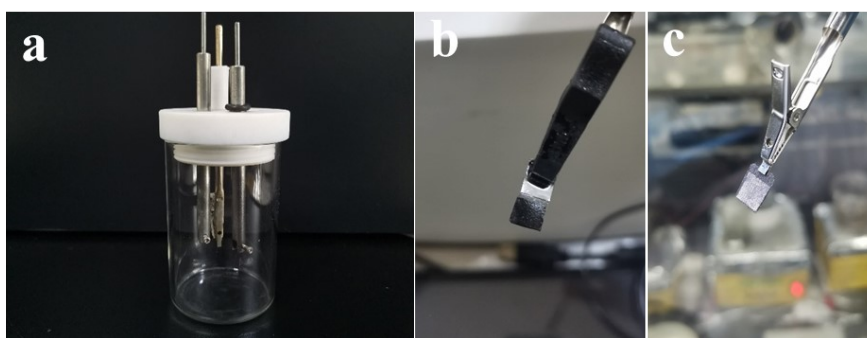

**Figure S1.** (a) Schematic diagram of three-electrode testing device. (b) The  $\text{FeCl}_2\text{-CR}$  electrode prepared by powder calendaring. (c) The graphite electrode clamped by molybdenum mesh.

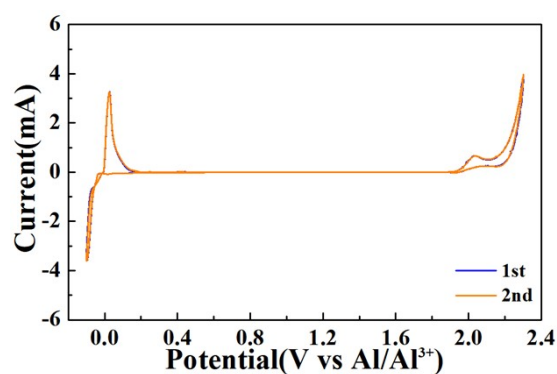

**Figure S2.** CV Curves of the Au electrode in three-electrode system at 10 mV/s.

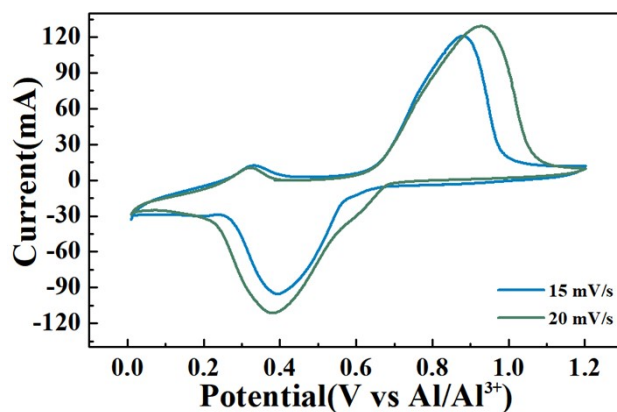

**Figure S3.** CV Curves of the Fe- $\text{FeCl}_2\text{-CR-60}$  electrode in three-electrode system at 15 mV/s and 20 mV/s.

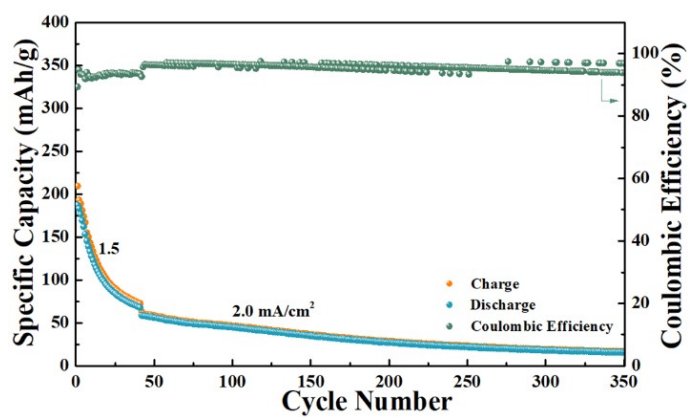

**Figure S4.** Cycling performance of the FeCl<sub>2</sub>-CR electrode in Fe/FeCl<sub>2</sub>-Graphite molten salt battery.

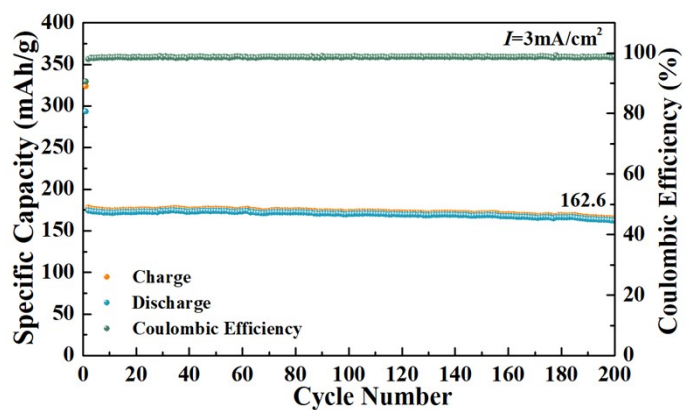

**Figure S5.** Cycling performance of the Fe-FeCl<sub>2</sub>-CR-60 electrode in Fe/FeCl<sub>2</sub>-Graphite molten salt battery.

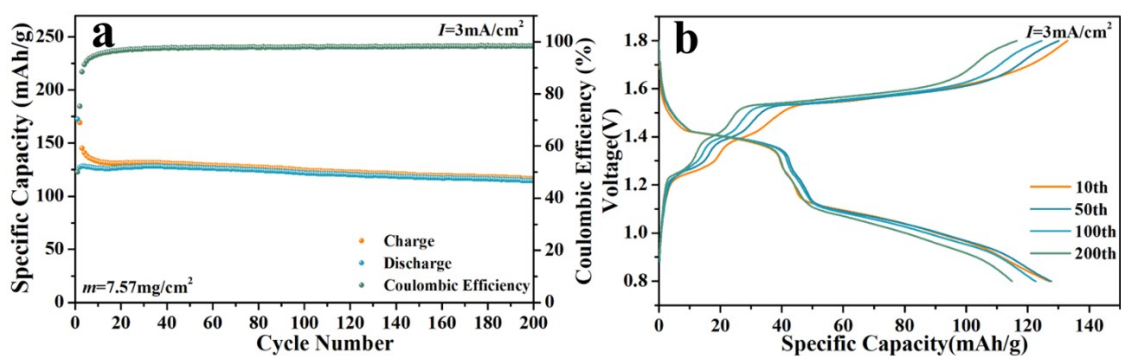

**Figure S6.** (a) Cycling performance of the Fe-FeCl<sub>2</sub>-CR-60 electrode with enhanced mass loading in Fe/FeCl<sub>2</sub>-graphite molten salt battery. (b) The corresponding voltage curves of the Fe-FeCl<sub>2</sub>-CR-60 electrode with enhanced mass loading.

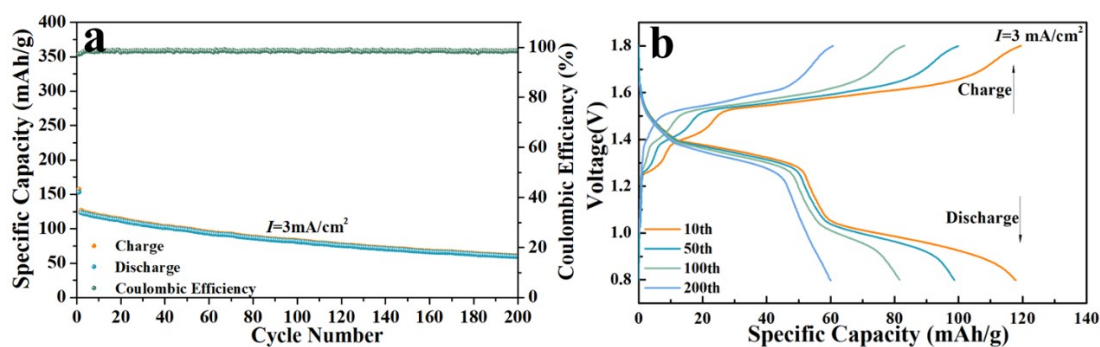

**Figure S7.** (a) Cycling performance of the Fe-FeCl<sub>2</sub>-CR-20 electrode in Fe/FeCl<sub>2</sub>-Graphite molten salt battery. (b) The corresponding voltage curves of the Fe-FeCl<sub>2</sub>-CR-20 electrode.

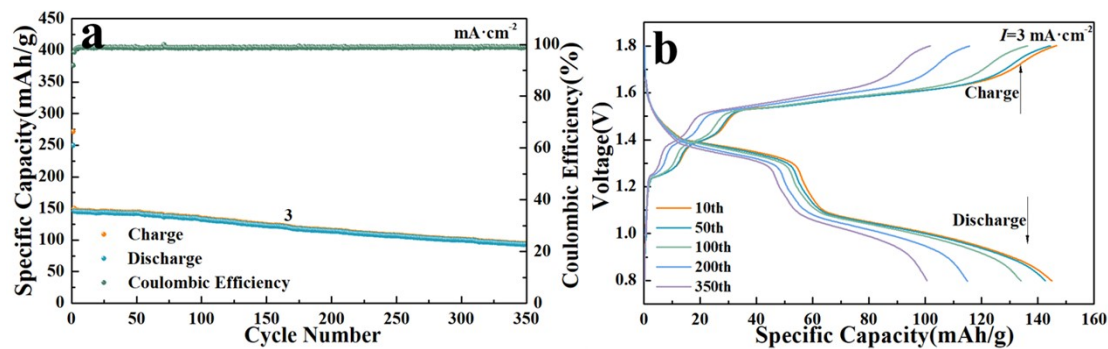

**Figure S8.** (a) Cycling performance of the Fe-FeCl<sub>2</sub>-CR-40 electrode in Fe/FeCl<sub>2</sub>-Graphite molten salt battery. (b) The corresponding voltage curves of the Fe-FeCl<sub>2</sub>-CR-40 electrode.

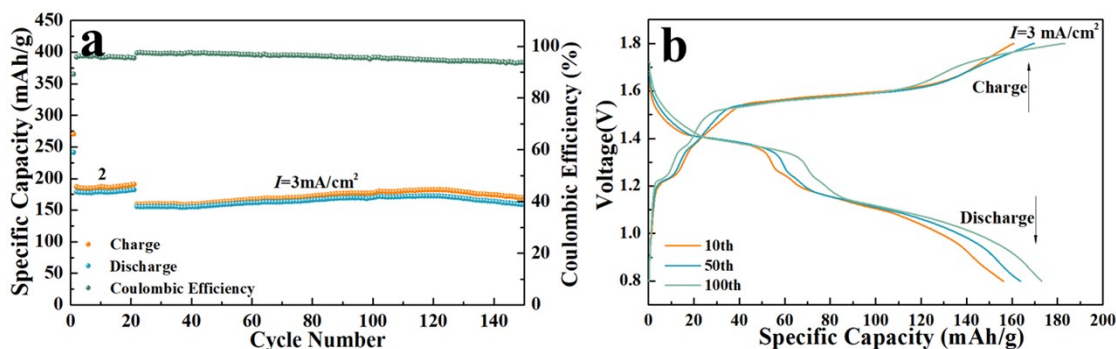

**Figure S9.** (a) Cycling performance of the Fe-FeCl<sub>2</sub>-CR-80 electrode in Fe/FeCl<sub>2</sub>-Graphite molten salt battery. (b) The corresponding voltage curves of the Fe-FeCl<sub>2</sub>-CR-80 electrode.

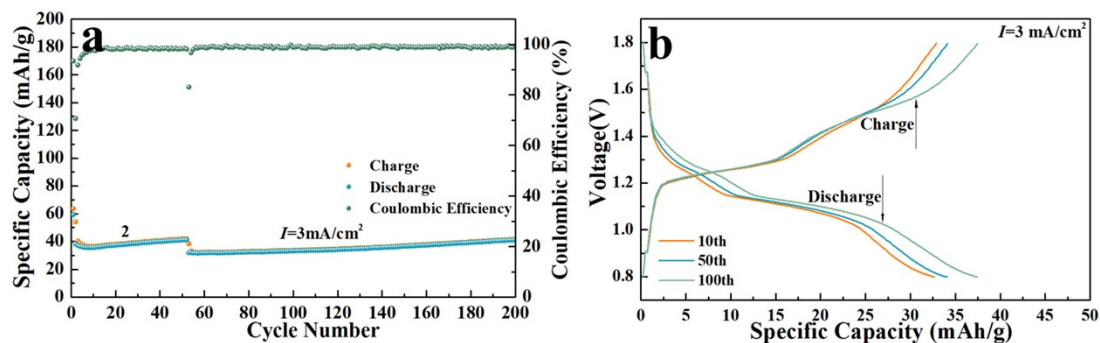

**Figure S10.** (a) Cycling performance of the Fe-CR electrode in Fe/FeCl<sub>2</sub>-Graphite molten salt battery. (b) The corresponding voltage curves of the Fe-CR electrode.

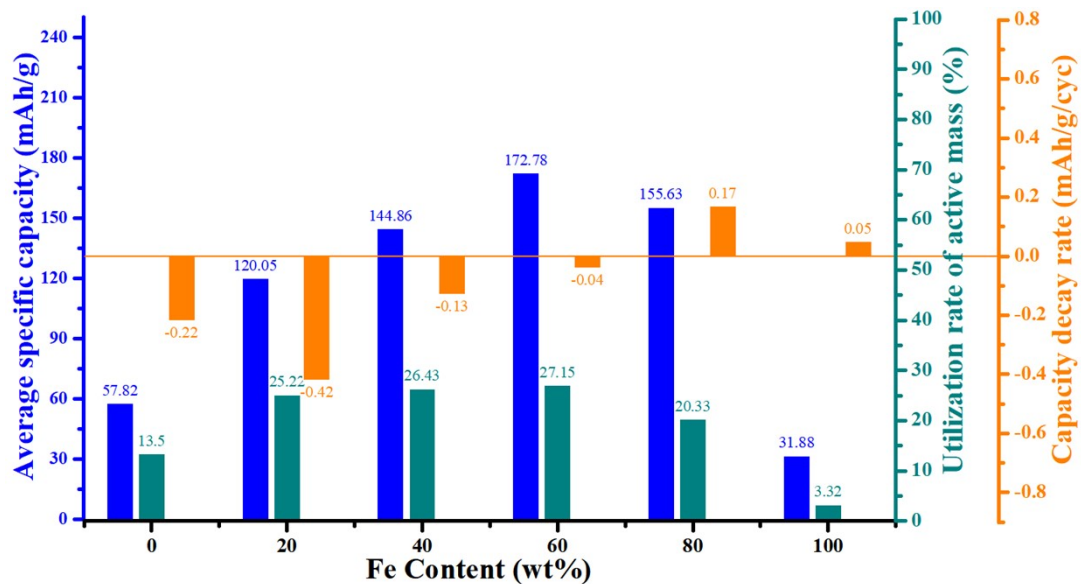

**Figure S11.** The electrochemical characteristics of Fe-FeCl<sub>2</sub>-CR electrodes with different Fe contents.

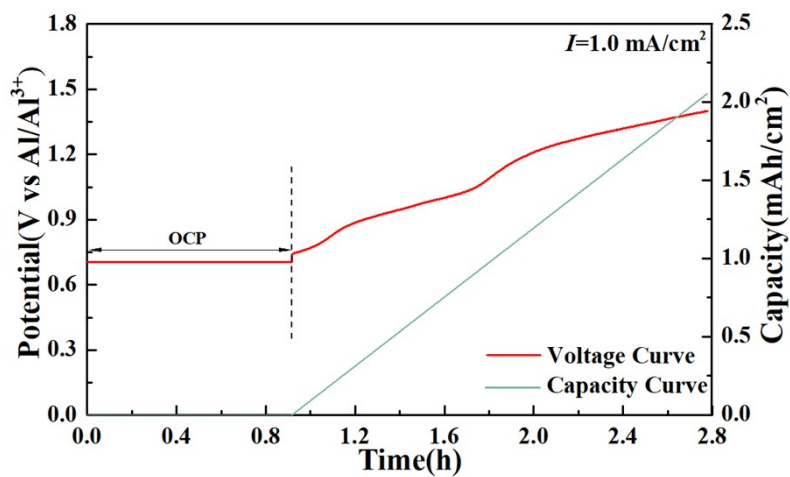

**Figure S12.** Galvanostatic chlorination curves of Fe-CR electrode.

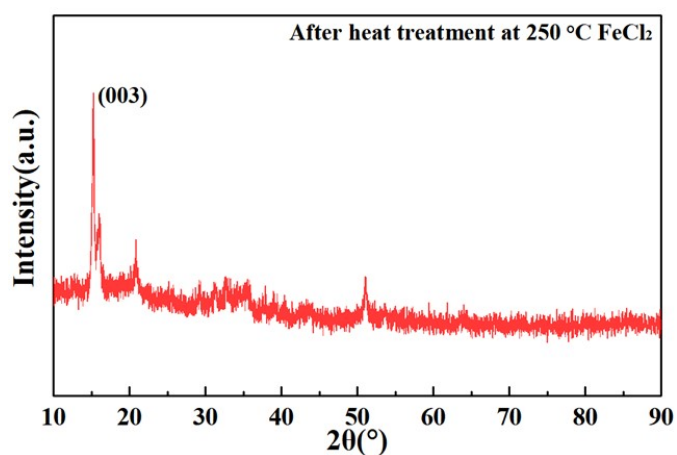

Figure S13. XRD pattern of  $\text{FeCl}_2$  material.

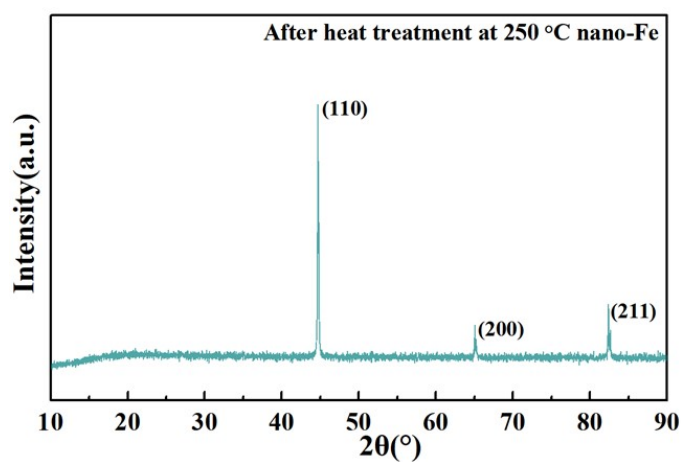

Figure S14. XRD pattern of nano-Fe powder material.

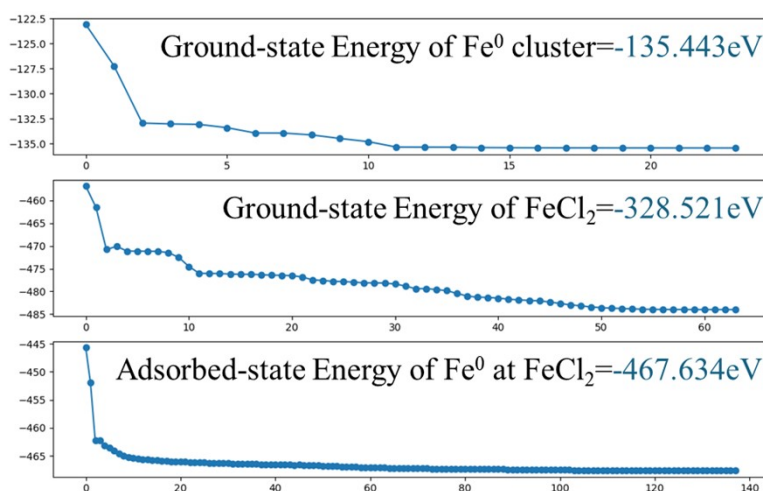

Figure S15. The original chart of the adsorbed energy calculation ( $-3.67\text{eV}$ ) of  $\text{Fe}^0$  cluster at  $\text{FeCl}_2$  (003).

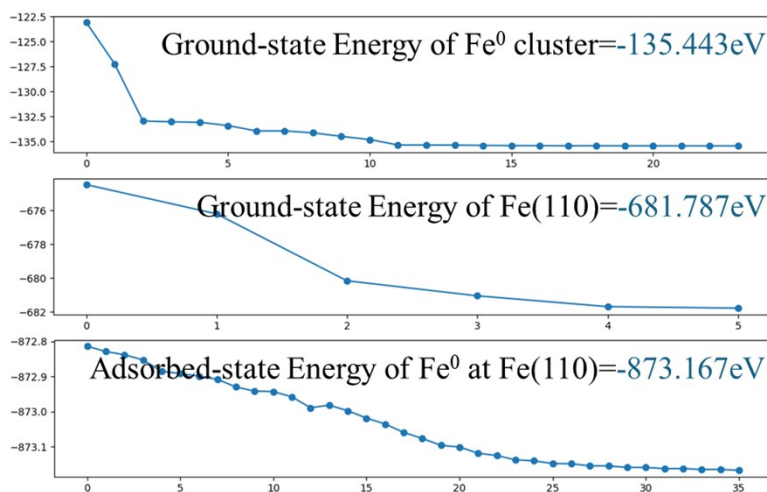

**Figure S16.** The original chart of the adsorbed energy calculation (-55.937eV) of Fe<sup>0</sup> cluster at Fe (110).

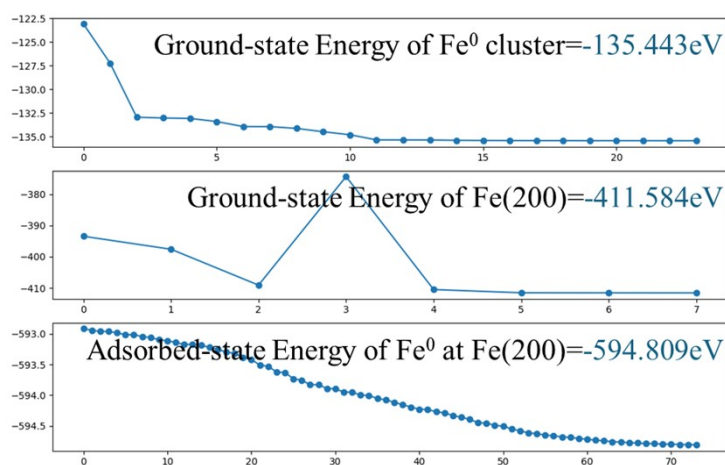

**Figure S17.** The original chart of the adsorbed energy calculation (-47.782eV) of Fe<sup>0</sup> cluster at Fe (200).

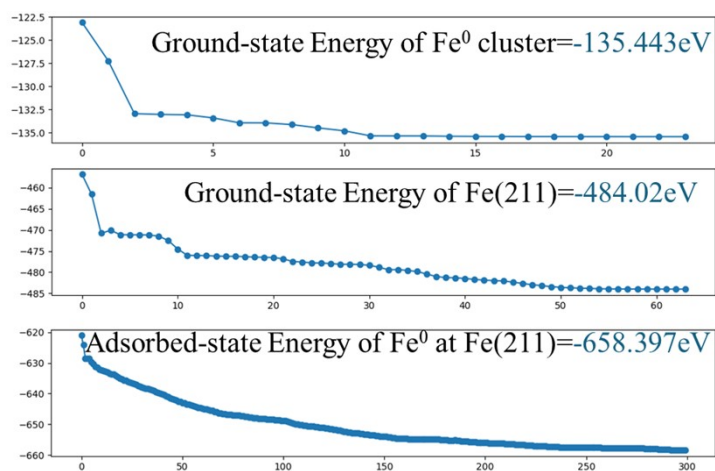

**Figure S18.** The original chart of the adsorbed energy calculation (-38.934 eV) of Fe<sup>0</sup> cluster at Fe(211).
